# Supplementary material for: Effect of Damaged Starch and Wheat-Bran Arabinoxylans on Wheat Starch and Wheat Starch–Gluten Systems
Source: MDPI journal article supplement (doi:10.3390/foods13050689), 2024-02-24
Supplement: s1 [file s1]

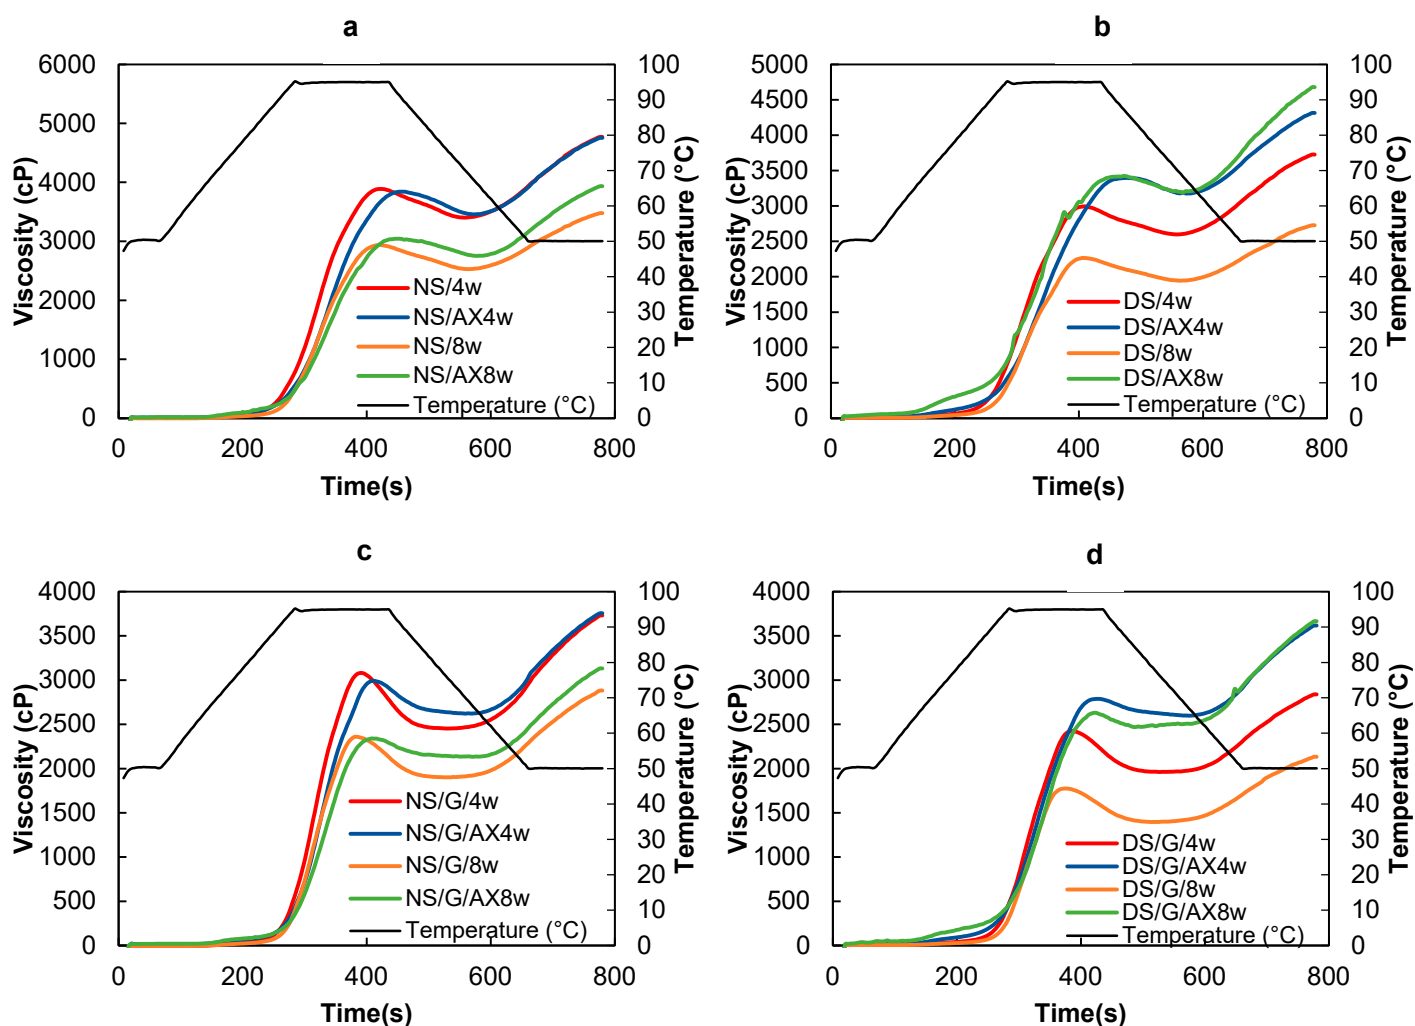

**Figure S1.**

Effect of arabinoxylans and damaged starch on the starch and starch-gluten pasting profiles in water. a) NS/4w and NS/AX4w: 11.9% w/w, NS/8w and NS/AX8w: 11.4% w/w, b) DS/4w and DS/AX4w: 11.9% w/w, DS/8w and DS/AX8w: 11.4% w/w, c) NS/G/4w and NS/G/AX4w: 10.8% w/w, NS/G/8w and NS/G/AX8w: 10.4% w/w, d) DS/G/4w and DS/G/AX4w: 10.8% w/w, DS/G/8w and DS/G/AX8w: 10.4% w/w.

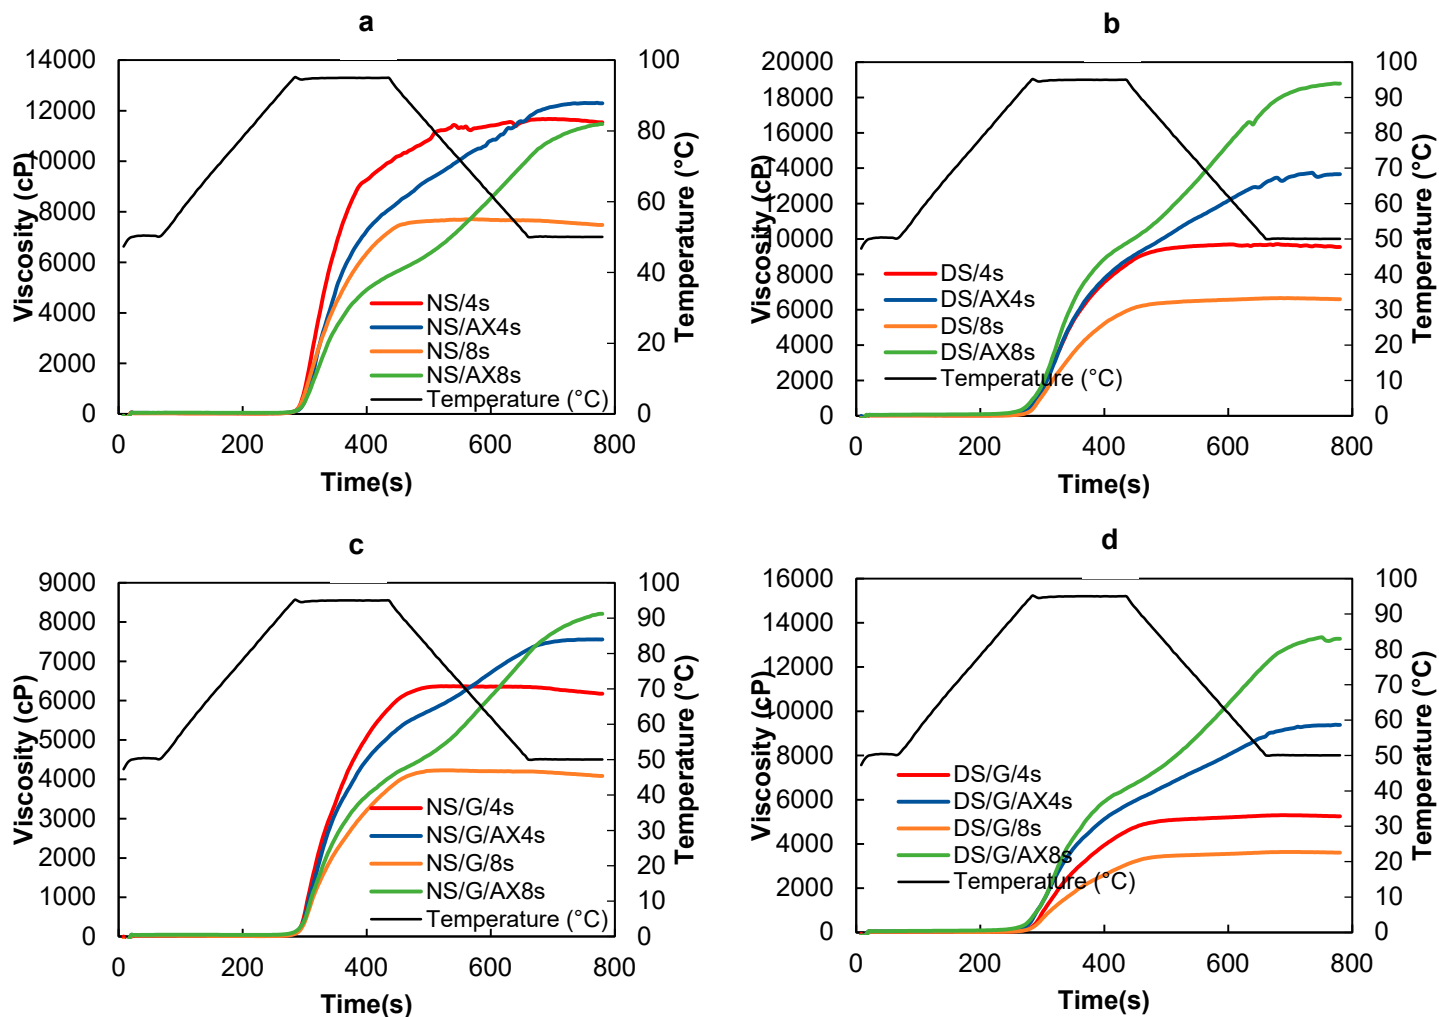

**Figure S2.**

Effect of arabinoxylans and damaged starch on the starch and starch-gluten pasting profiles in water. a) NS/4s and NS/AX4s: 11.9% w/w, NS/8s and NS/AX8s: 11.4% w/w, b) DS/4s and DS/AX4s: 11.9% w/w, DS/8s and DS/AX8s: 11.4% w/w, c) NS/G/4s and NS/G/AX4s: 10.8% w/w, NS/G/8s and NS/G/AX8s: 10.4% w/w, d) DS/G/4s and DS/G/AX4s: 10.8% w/w, DS/G/8s and DS/G/AX8s: 10.4% w/w.
